# Supplementary material for: Molecular Mechanisms for the Carnosine-Induced Activation of Muscle–Brain Interaction
Source: MDPI journal article supplement (doi:10.3390/nu15061479), 2023-03-19
Supplement: s1 [file s1]

Table S1 Primers used for RT-qPCR

| Primer         | sequence                                              |
|----------------|-------------------------------------------------------|
| $\beta$ -actin | GGCCAGGTCATCACTATTG<br>GAGGTCTTTACGGATGTCAAC          |
| MyoD           | ATGAGGCCTTCGAGACGCTC<br>CAGAGCCTGCAGACCTTCGA          |
| Myogenin       | CCTACAGGCCTTGCTCAGCT<br>CGAACTCCAGTGCATTGCCC          |
| MyHC1          | AGCATTCTCCTGCTGTTTCCT<br>GGCTGAGCCTTGGATTCTCA         |
| MyHC2a         | ATTCTCAGGCTTCAGGATTTGGTG<br>CTTGCGGAACTTGGATAGATTTGTG |
| MyHC2x         | CATCCCTAAGGCAGGCTCT<br>AGCCTCGATTGCTCCTTTT            |
| MyHC2b         | CTGCAGGACTTGGTGGACAAACTA<br>TTGGCCAGGTTGACATTGGA      |
| Sema3A         | GGCCAGGTCATCACTATTG<br>GAGGTCTTTACGGATGTCAAC          |
| Netrin-1       | GCCTTCCTCACCGACCTCAA<br>TTCTTGCCGAGCGACAGAGT          |
| Neuropilin 1   | ACCCTGAGAGAGCCACACAC<br>CCTGGTCGTCGTCACACTCA          |
| Neuropilin 2   | CTCTCGGGCCTCATTGCTGA<br>GGCTTGAGGGTTCCGAGGAA          |
| Neogenin       | TCCCACTCCCATGATGCCAC<br>TGGTGTTTGGGCAGGGAGTT          |
| DCC            | TTTGTCCGTTTGAGCTGGCG<br>AAGCTCGCTCCCTGTTGTCA          |
| Sirt1          | GCAGACGTGGTAATGTCCAAACAG<br>ACATCTTGGCAGTATTTGTGGTGAA |
| PGC-1 $\alpha$ | CCGTAAATCTGCGGGATGATG<br>CAGTTTCGTTGACCTGCGTAA        |
| TFAM           | CATTTATCTATCTGAAAGCTTCC<br>CTCTTCCCAAGACTTCATTTT      |
| BDNF           | AGTTGGAAGCCTGAATGAATGGA<br>CTGATGCTCAGGAACCCAGGA      |
| Irisin         | TGCCCACATGAAGAGGACCA<br>CCACGCGAGGCTGAAAAGAT          |
| IL-15          | CTCACCAGCAAGGACCATGAAG<br>CCAGTTGCAGAGTTGGACGAAG      |

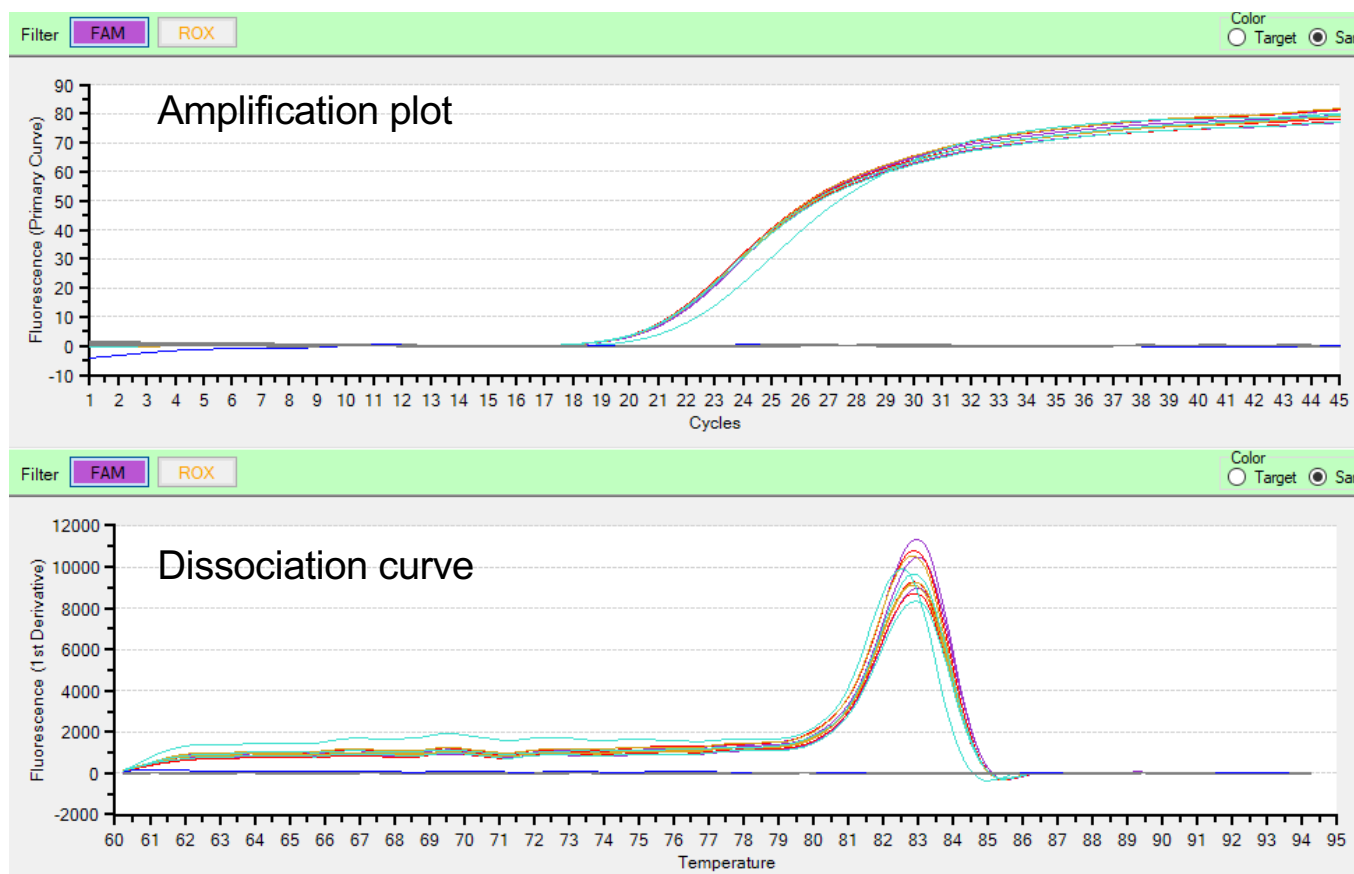

Figure. S1 Specificity check of PCR reaction. The specificity of the PCR reaction was confirmed by amplification plot and dissociation curve data for each gene.

0 mM

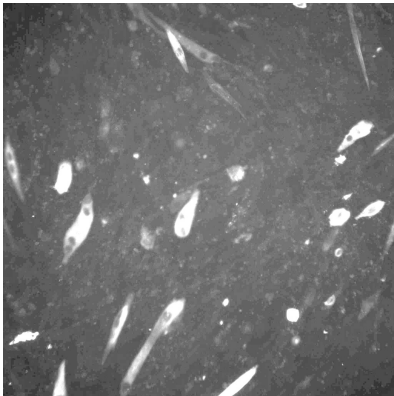

1 mM

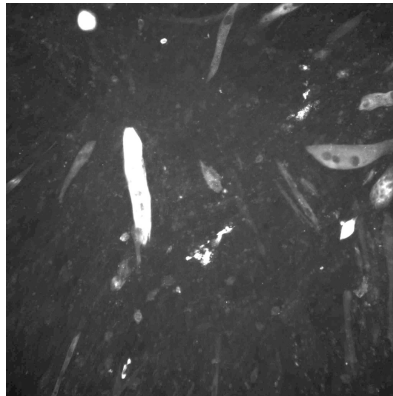

3 mM

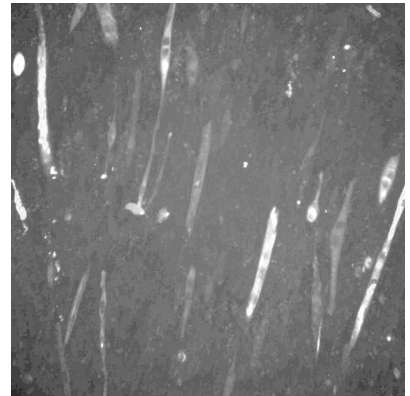

10 mM

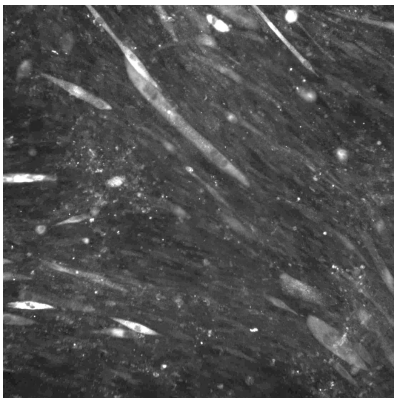

30 mM

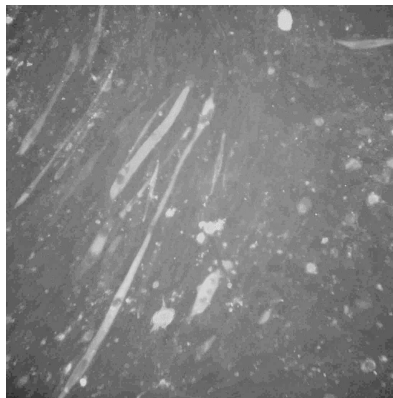

50 mM

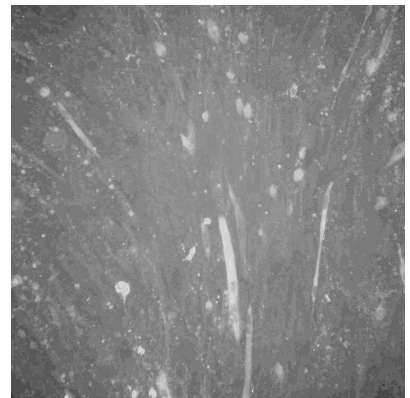

Figure. S2 C2C12 cells induced to differentiate in the presence of various concentrations of carnosine (0 ~ 50 mM). All stained cells are shown in grayscale, stained with slow and fast myosin skeletal heavy chain antibodies in C2C12 cells after differentiation. Same color photographs (0 mM and 50 mM) are also shown in Figure 2E and F.
